# Supplementary material
Source: PubMed Central journal article supplement (PMC3148736)
Supplement: JCI45967sd.pdf [file JCI45967sd.pdf]

## Supplemental Material

### **Cell cycle–related kinase is a direct androgen receptor–regulated gene that drives $\beta$ -catenin/T cell factor–dependent hepatocarcinogenesis**

Hai Feng, Alfred S.L. Cheng, Daisy P. Tsang, May S. Li, Minnie Y. Go, Yue S. Cheung, Gui-jun Zhao, Samuel S. Ng, Marie C. Lin, Jun Yu, Paul B. Lai, Ka F. To and Joseph J.Y. Sung

#### Supplemental Figures

Figure S1. Quantitative ChIP-PCR analysis of AR direct target genes in HCC cells.

Figure S2. Effect of bicalutamide on HCC cell growth.

Figure S3. Effects of androgen, AR and protein synthesis inhibitor on *CCRK* gene expression.

Figure S4. Effect of *CCRK* on AR-induced cell cycle progression.

Figure S5. In vitro kinase assay of the phosphorylation of recombinant GSK3 $\beta$  by recombinant *CCRK*.

Figure S6. Effect of *CCRK* on expression of  $\beta$ -catenin pro-proliferative target genes.

Figure S7. Expression of active  $\beta$ -catenin and its target genes in xenograft tumor tissues.

#### Supplemental Tables

Table S1. AR direct target genes in Huh7 and PLC5 HCC cells.

Table S2. AR, *CCRK* and  $\beta$ -catenin immunohistochemical scores in HCC tissues.

Table S3. Primers used for ChIP-PCR and RT-PCR in this study.

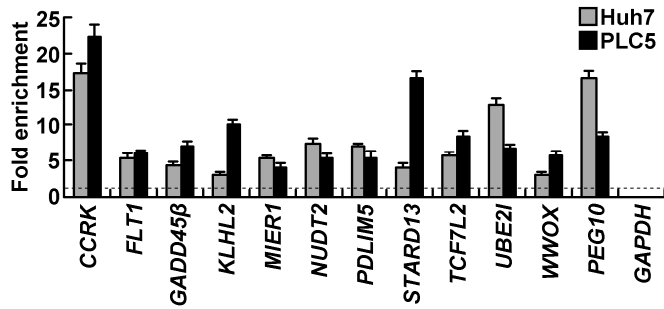

**Figure S1. Quantitative ChIP-PCR analysis of AR direct target genes in HCC cells.**

Quantitative ChIP-PCR validation of AR occupancy in 10 randomly-selected loci in both Huh7 and PLC5 cells. Fold enrichment represents ratio of DNA amounts pulled-down from AR antibody over IgG control, and each error bar represents standard deviation calculated from triplicates. The fold enrichments of *CCRK* and a known AR target, *PEG10*, are shown. *GAPDH* locus serves as a negative control.

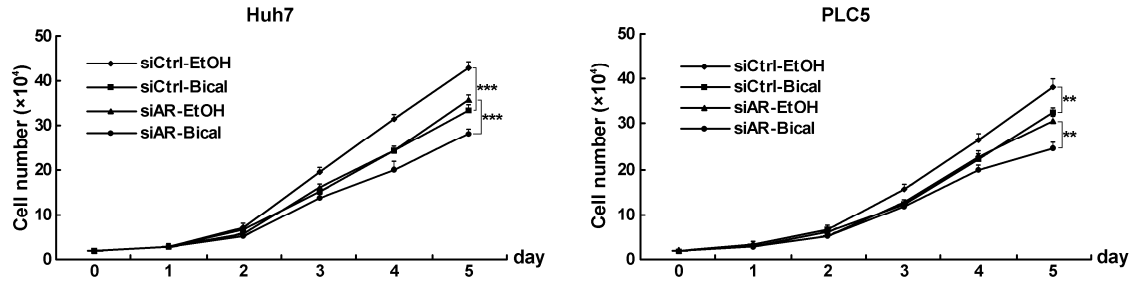

**Figure S2. Effect of bicalutamide on HCC cell growth.**

Inhibiting AR activity retarded HCC cell growth. Huh7 and PLC5 cells ( $2 \times 10^4$ ) seeded on 24-well plate were transfected with 25 nM siAR or siCtrl in the presence or absence of  $10 \mu\text{M}$  bicalutamide. The cell numbers were determined by trypan blue dye exclusion every 24 hours for 5 consecutive days after transfection.

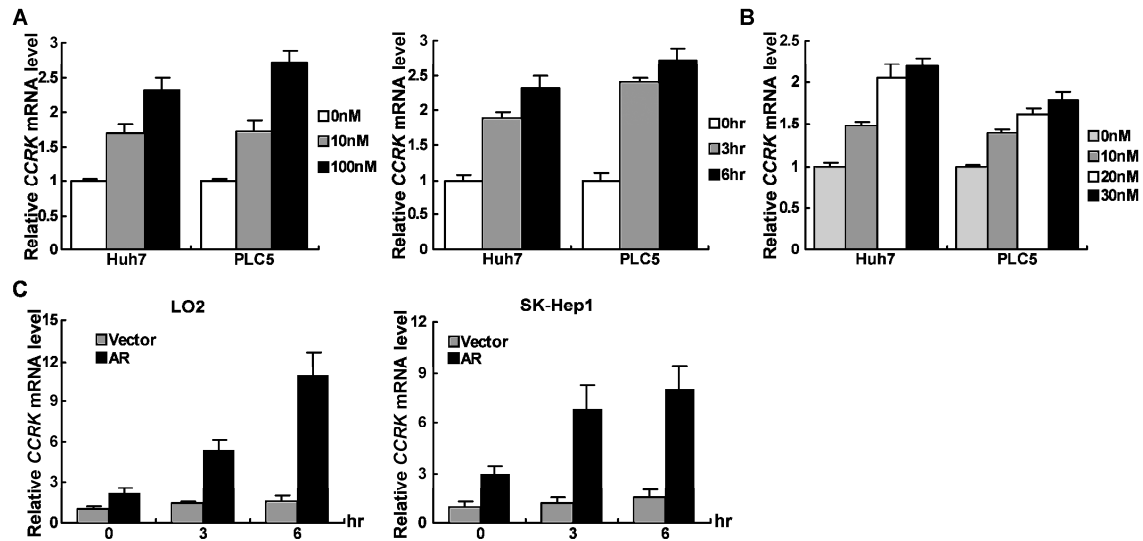

**Figure S3. Effects of androgen, AR and protein synthesis inhibitor on *CCRK* gene expression.**

(A) R1881 directly affected *CCRK* transcription. Quantitative RT-PCR showed that *CCRK* transcript level was increased by R1881 in a dose- and time-dependent manner in the presence of 50 μM cycloheximide. HCC cells were treated with different doses of R1881 for 6 hours (left) or with 100 nM R1881 for different periods of time (right). *GAPDH* was used as an internal control. (B) Physiological concentration range of testosterone increased *CCRK* transcript levels. Quantitative RT-PCR analysis of *CCRK* transcript level was performed in HCC cells treated with different doses of testosterone for 6 hours. (C) R1881-induced *CCRK* transcription was AR-dependent. Relative transcript level of *CCRK* was measured by quantitative RT-PCR in AR-expressing or control LO2 (left) and SK-Hep1 (right) cells stimulated with 100 nM R1881 for the indicated time.

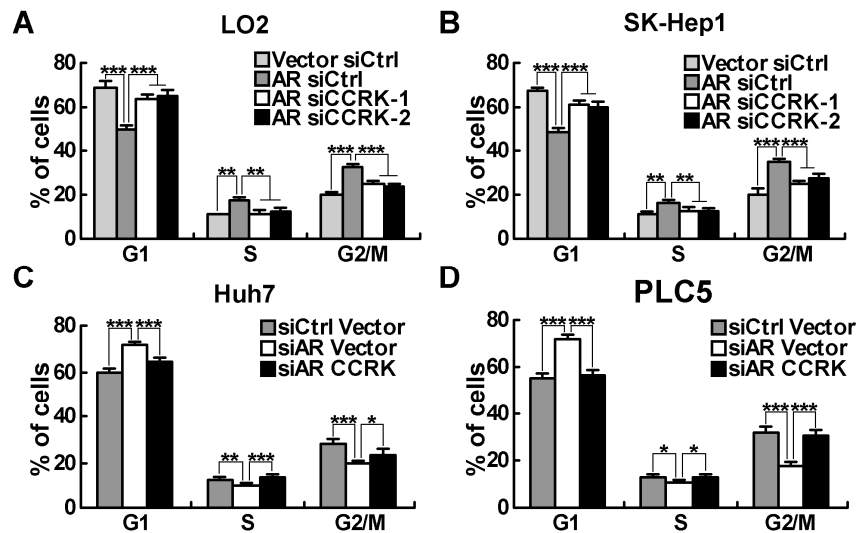

**Figure S4. Effect of CCRK on AR-induced cell cycle progression.**

(A and B) AR-induced G1-S cell cycle progression was abrogated by CCRK down-regulation. The cell cycle distribution of R1881-stimulated (A) Vec-LO2 and AR-LO2 and (B) Vec-SK-Hep1 and AR-SK-Hep1 cells treated with siCtrl, siCCRK-1 or siCCRK-2 were measured by propidium iodide staining and flow cytometry. (C and D) Ectopic CCRK expression attenuated G1 phase arrest in AR-knockdown cells. Flow cytometry was performed in R1881-stimulated (C) Huh7 and (D) PLC5 cells transiently transfected with siCtrl or siAR and CCRK-expressing or empty vector. \* $p < 0.05$ , \*\* $p < 0.01$ , \*\*\* $p < 0.001$ .

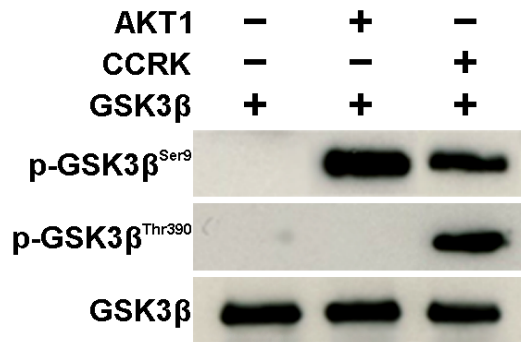

**Figure S5. In vitro kinase assay of the phosphorylation of recombinant GSK3β by recombinant CCRK.**

Recombinant CCRK directly phosphorylated recombinant GSK3β at Ser9 and Thr390. Proteins were incubated in the presence of ATP, and the reaction products were analyzed by immunoblotting using the same antibodies to Ser9-, Thr390-phosphorylated GSK3β and total GSK3β as that used in Figure 6. AKT1, known to induce phosphorylation of GSK3β at Ser9, was used as a positive control.

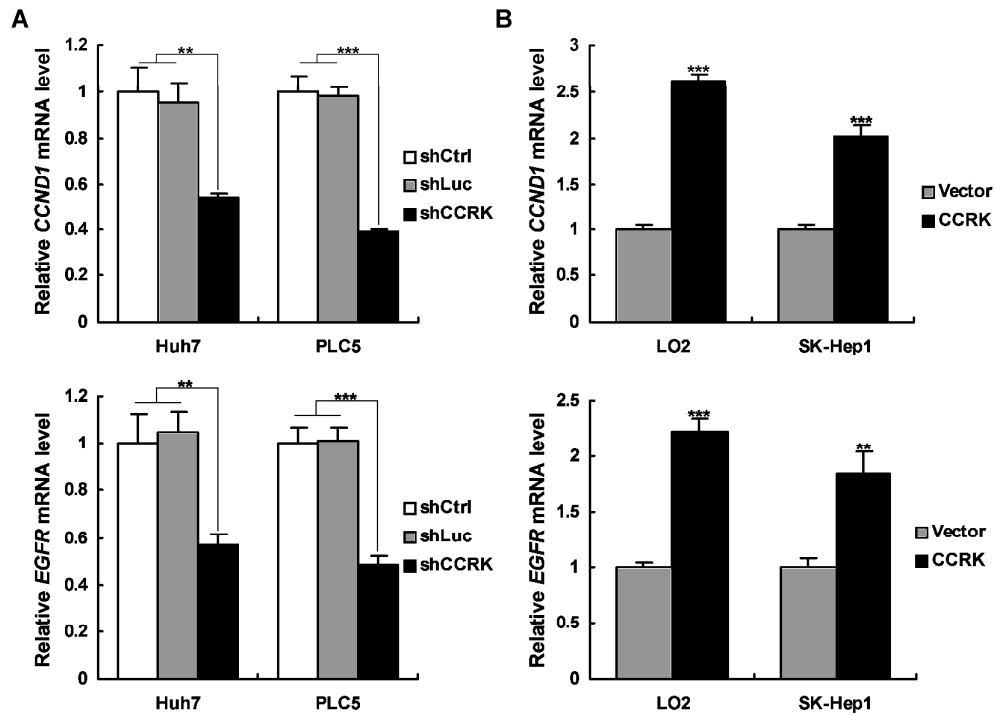

**Figure S6. Effect of CCRK on expression of  $\beta$ -catenin pro-proliferative target genes**

Expressions of *CCND1* and *EGFR* were modulated by CCRK. (A) Compared with shCtrl- and shLuc-transfectants, *CCND1* and *EGFR* expressions were decreased in Huh7 and PLC5 cells stably expressing shCCRK as detected by quantitative RT-PCR. *GAPDH* was used as an internal control. (B) Stable expression of CCRK in LO2 and SK-Hep1 cells up-regulated *CCND1* and *EGFR* expressions. \*\* $p < 0.01$ , \*\*\* $p < 0.001$ .

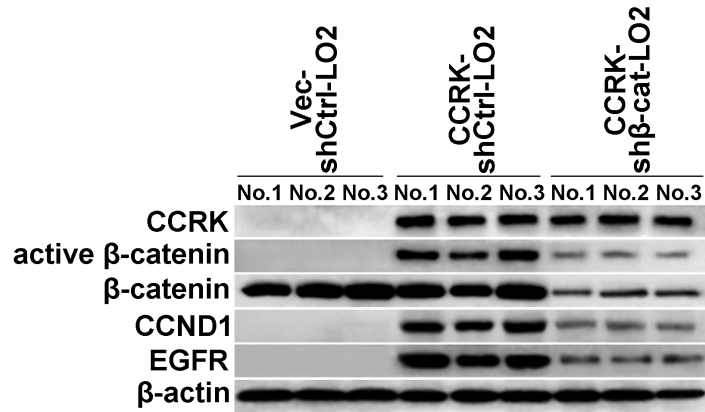

**Figure S7. Expression of active  $\beta$ -catenin and its target genes in xenograft tumor tissues.** Expressions of CCRK, CCND1, EGFR, active and total  $\beta$ -catenin in the Vec-shCtrl-LO2, CCRK-shCtrl-LO2 and CCRK-sh $\beta$ -catenin-LO2 xenograft tumor tissues were detected by Western blot.  $\beta$ -actin was used as a loading control.



**Table S1. AR direct target genes in Huh7 and PLC5 HCC cells.**

Huh7 cell line

| <sup>1</sup> Gene | <sup>2</sup> Chromosome | <sup>2</sup> Start | <sup>2</sup> End | <sup>3</sup> MinP[x] |
|-------------------|-------------------------|--------------------|------------------|----------------------|
| ABCA1             | chr9                    | 106703644          | 106735732        | 9.90E-04             |
| <b>ACE2</b>       | <b>chrX</b>             | <b>15526648</b>    | <b>15534535</b>  | <b>1.84E-04</b>      |
| ADAMTSL1          | chr9                    | 18458865           | 18466713         | 9.59E-04             |
| <b>ADAR</b>       | <b>chr1</b>             | <b>152844950</b>   | <b>152871257</b> | <b>4.40E-03</b>      |
| ADH7              | chr4                    | 100573321          | 100580684        | 3.58E-04             |
| AMN1              | <b>chr12</b>            | <b>31770868</b>    | <b>31778797</b>  | <b>3.59E-03</b>      |
| APAF1             | <b>chr12</b>            | <b>97563218</b>    | <b>97568786</b>  | <b>5.20E-03</b>      |
| ARHGEF18          | <b>chr19</b>            | <b>7346362</b>     | <b>7413527</b>   | <b>2.60E-03</b>      |
| ARL4D             | <b>chr17</b>            | <b>38827000</b>    | <b>38835034</b>  | <b>3.70E-03</b>      |
| ASF1B             | chr19                   | 14091536           | 14111723         | 2.56E-04             |
| ATP11C            | <b>chrX</b>             | <b>138739520</b>   | <b>138747591</b> | <b>8.75E-03</b>      |
| ATP8A2            | <b>chr13</b>            | <b>24935793</b>    | <b>24942454</b>  | <b>7.69E-04</b>      |
| B3GALT6           | <b>chr1</b>             | <b>1157693</b>     | <b>1162786</b>   | <b>1.16E-04</b>      |
| BACH2             | <b>chr6</b>             | <b>91060808</b>    | <b>91068712</b>  | <b>9.55E-03</b>      |
| BANP              | <b>chr16</b>            | <b>86537656</b>    | <b>86566623</b>  | <b>5.29E-03</b>      |
| BCL11B            | <b>chr14</b>            | <b>98805000</b>    | <b>98813103</b>  | <b>7.62E-03</b>      |
| BOLA3             | <b>chr2</b>             | <b>74210871</b>    | <b>74233956</b>  | <b>5.49E-03</b>      |
| C10orf22          | <b>chr10</b>            | <b>64229206</b>    | <b>64237456</b>  | <b>1.43E-03</b>      |
| C11orf58          | <b>chr11</b>            | <b>16712375</b>    | <b>16719418</b>  | <b>5.96E-03</b>      |
| C11orf63          | <b>chr11</b>            | <b>122253347</b>   | <b>122264241</b> | <b>5.33E-03</b>      |
| C14orf93          | <b>chr14</b>            | <b>22526007</b>    | <b>22554690</b>  | <b>3.59E-03</b>      |
| C21orf45          | <b>chr21</b>            | <b>32571516</b>    | <b>32575919</b>  | <b>8.74E-03</b>      |
| C2orf29           | <b>chr2</b>             | <b>101230597</b>   | <b>101237934</b> | <b>5.85E-03</b>      |
| C4orf15           | <b>chr4</b>             | <b>2200333</b>     | <b>2218985</b>   | <b>7.94E-04</b>      |
| CABP7             | <b>chr22</b>            | <b>28440904</b>    | <b>28448865</b>  | <b>8.56E-03</b>      |
| CCND1             | <b>chr11</b>            | <b>69159563</b>    | <b>69167767</b>  | <b>1.06E-04</b>      |
| CCNF              | <b>chr16</b>            | <b>2414051</b>     | <b>2448669</b>   | <b>9.97E-04</b>      |
| CCRK              | <b>chr9</b>             | <b>89777119</b>    | <b>89782729</b>  | <b>8.74E-04</b>      |
| CD164             | <b>chr6</b>             | <b>109807871</b>   | <b>109815857</b> | <b>5.23E-05</b>      |
| CD3E              | <b>chr11</b>            | <b>117677776</b>   | <b>117683219</b> | <b>1.97E-04</b>      |
| CDH2              | <b>chr18</b>            | <b>24008571</b>    | <b>24016616</b>  | <b>3.95E-03</b>      |
| CDH24             | <b>chr14</b>            | <b>22592434</b>    | <b>22600650</b>  | <b>6.24E-03</b>      |
| CDH8              | <b>chr16</b>            | <b>60625209</b>    | <b>60633709</b>  | <b>9.80E-05</b>      |

|                |              |                  |                  |                 |
|----------------|--------------|------------------|------------------|-----------------|
| <b>CDK5R2</b>  | <b>chr2</b>  | <b>219527554</b> | <b>219535227</b> | <b>5.70E-03</b> |
| <b>CDK6</b>    | <b>chr7</b>  | <b>92298051</b>  | <b>92306286</b>  | <b>5.95E-03</b> |
| <b>CDKN1B</b>  | <b>chr12</b> | <b>12756098</b>  | <b>12764388</b>  | <b>8.54E-03</b> |
| CGA            | chr6         | 87859667         | 87866767         | 2.59E-04        |
| <b>CGNL1</b>   | <b>chr15</b> | <b>55450860</b>  | <b>55519987</b>  | <b>8.17E-06</b> |
| <b>CHGB</b>    | <b>chr20</b> | <b>5834652</b>   | <b>5842805</b>   | <b>9.21E-05</b> |
| <b>CHODL</b>   | <b>chr21</b> | <b>18533713</b>  | <b>18541932</b>  | <b>3.42E-05</b> |
| <b>CIAO1</b>   | <b>chr2</b>  | <b>96295590</b>  | <b>96300874</b>  | <b>5.96E-04</b> |
| CKS1B          | chr1         | 153213960        | 153217808        | 6.70E-04        |
| <b>CLIC6</b>   | <b>chr21</b> | <b>34958148</b>  | <b>34965915</b>  | <b>4.87E-03</b> |
| <b>CLUL1</b>   | <b>chr18</b> | <b>584836</b>    | <b>609132</b>    | <b>5.63E-03</b> |
| <b>CNTRF</b>   | <b>chr9</b>  | <b>34577338</b>  | <b>34584652</b>  | <b>8.74E-03</b> |
| COL27A1        | chr9         | 115952688        | 115960507        | 2.51E-04        |
| <b>CPXCR1</b>  | <b>chrX</b>  | <b>87883406</b>  | <b>87891388</b>  | <b>8.75E-03</b> |
| <b>CPZ</b>     | <b>chr4</b>  | <b>8640399</b>   | <b>8647960</b>   | <b>5.75E-03</b> |
| <b>CSNK1D</b>  | <b>chr17</b> | <b>77822118</b>  | <b>77830310</b>  | <b>9.53E-03</b> |
| <b>CTGF</b>    | <b>chr6</b>  | <b>132311731</b> | <b>132319190</b> | <b>8.76E-03</b> |
| <b>CYR61</b>   | <b>chr1</b>  | <b>85813751</b>  | <b>85821729</b>  | <b>7.56E-04</b> |
| DCTN5          | chr16        | 23560390         | 23562870         | 2.14E-04        |
| <b>DDX31</b>   | <b>chr9</b>  | <b>134535770</b> | <b>134540982</b> | <b>5.33E-05</b> |
| DHRS12         | chr13        | 51273871         | 51281605         | 3.10E-04        |
| <b>DIS3L</b>   | <b>chr15</b> | <b>64367247</b>  | <b>64375491</b>  | <b>3.59E-03</b> |
| DKK1           | chr10        | 53738570         | 53746647         | 8.79E-04        |
| <b>DNAJC5G</b> | <b>chr2</b>  | <b>27350115</b>  | <b>27357824</b>  | <b>6.52E-04</b> |
| DPPA2          | chr3         | 110515580        | 110521646        | 2.88E-04        |
| <b>DPPA3</b>   | <b>chr12</b> | <b>7749947</b>   | <b>7757668</b>   | <b>6.84E-03</b> |
| <b>DRD3</b>    | <b>chr3</b>  | <b>115371150</b> | <b>115384135</b> | <b>8.88E-03</b> |
| <b>DSCR6</b>   | <b>chr21</b> | <b>37295531</b>  | <b>37303244</b>  | <b>8.03E-03</b> |
| <b>DSCR9</b>   | <b>chr21</b> | <b>37497423</b>  | <b>37515952</b>  | <b>8.46E-03</b> |
| <b>DTNA</b>    | <b>chr18</b> | <b>30321780</b>  | <b>30654712</b>  | <b>7.76E-04</b> |
| <b>DUSP21</b>  | <b>chrX</b>  | <b>44585374</b>  | <b>44590838</b>  | <b>5.48E-03</b> |
| <b>DYRK1A</b>  | <b>chr21</b> | <b>37656075</b>  | <b>37716752</b>  | <b>7.46E-03</b> |
| <b>EGFLAM</b>  | <b>chr5</b>  | <b>38290135</b>  | <b>38483905</b>  | <b>2.72E-05</b> |
| <b>EGR2</b>    | <b>chr10</b> | <b>64243403</b>  | <b>64251556</b>  | <b>3.26E-03</b> |
| <b>EIF1AX</b>  | <b>chrX</b>  | <b>20067579</b>  | <b>20074596</b>  | <b>2.39E-04</b> |
| EIF4E          | chr4         | 100066990        | 100075043        | 4.76E-04        |
| <b>ENDOGL1</b> | <b>chr3</b>  | <b>38509729</b>  | <b>38515292</b>  | <b>8.42E-05</b> |
| <b>ERH</b>     | <b>chr14</b> | <b>68930767</b>  | <b>68934716</b>  | <b>6.80E-06</b> |

|                 |              |                  |                  |                 |
|-----------------|--------------|------------------|------------------|-----------------|
| <b>ESCO1</b>    | <b>chr18</b> | <b>17432281</b>  | <b>17435629</b>  | <b>8.54E-03</b> |
| <b>EVI1</b>     | <b>chr3</b>  | <b>170344352</b> | <b>170352485</b> | <b>4.48E-04</b> |
| <b>EXOSC3</b>   | <b>chr9</b>  | <b>37772605</b>  | <b>37780549</b>  | <b>2.16E-05</b> |
| <b>FAM45B</b>   | <b>chr10</b> | <b>120853685</b> | <b>129457739</b> | <b>5.73E-04</b> |
| FAM46C          | chr1         | 117944684        | 117952583        | 6.85E-04        |
| <b>FAM62A</b>   | <b>chr12</b> | <b>54803103</b>  | <b>54810819</b>  | <b>7.53E-03</b> |
| <b>FBS1</b>     | <b>chr16</b> | <b>30578866</b>  | <b>30586483</b>  | <b>3.84E-03</b> |
| <b>FBXO15</b>   | <b>chr18</b> | <b>69961442</b>  | <b>69965896</b>  | <b>3.70E-03</b> |
| <b>FGF14</b>    | <b>chr13</b> | <b>101364838</b> | <b>101857442</b> | <b>3.60E-03</b> |
| <b>FGFR1</b>    | <b>chr8</b>  | <b>38432513</b>  | <b>38450798</b>  | <b>8.76E-03</b> |
| <b>FLI1</b>     | <b>chr11</b> | <b>128063784</b> | <b>128071748</b> | <b>3.84E-03</b> |
| <b>FLJ21127</b> | <b>chr12</b> | <b>109530895</b> | <b>109538392</b> | <b>9.80E-03</b> |
| <b>FLT1</b>     | <b>chr13</b> | <b>27964543</b>  | <b>27972661</b>  | <b>2.18E-04</b> |
| <b>FLT3</b>     | <b>chr13</b> | <b>27570504</b>  | <b>27576660</b>  | <b>2.65E-04</b> |
| <b>FOS</b>      | <b>chr14</b> | <b>74809900</b>  | <b>74817771</b>  | <b>8.88E-03</b> |
| <b>FOXA2</b>    | <b>chr20</b> | <b>22510624</b>  | <b>22519425</b>  | <b>8.74E-03</b> |
| <b>GABRA3</b>   | <b>chrX</b>  | <b>151308976</b> | <b>151373033</b> | <b>2.25E-04</b> |
| GABRR1          | chr6         | 89982346         | 89989297         | 4.15E-05        |
| <b>GADD45B</b>  | <b>chr19</b> | <b>2423856</b>   | <b>2429726</b>   | <b>1.17E-04</b> |
| <b>GATA5</b>    | <b>chr20</b> | <b>60481532</b>  | <b>60489851</b>  | <b>4.02E-03</b> |
| <b>GDPD2</b>    | <b>chrX</b>  | <b>69557553</b>  | <b>69562431</b>  | <b>5.61E-04</b> |
| GFRA2           | chr8         | 21650600         | 21658150         | 4.86E-05        |
| GLB1L           | chr2         | 219813005        | 219818218        | 2.88E-04        |
| <b>GNAI2</b>    | <b>chr3</b>  | <b>50238692</b>  | <b>50251219</b>  | <b>7.57E-03</b> |
| <b>GPR87</b>    | <b>chr3</b>  | <b>152514964</b> | <b>152522610</b> | <b>8.45E-03</b> |
| <b>GRIA4</b>    | <b>chr11</b> | <b>104980777</b> | <b>104989227</b> | <b>7.31E-04</b> |
| <b>GRIN2A</b>   | <b>chr16</b> | <b>10179347</b>  | <b>10186292</b>  | <b>8.34E-03</b> |
| <b>GRLF1</b>    | <b>chr19</b> | <b>52108410</b>  | <b>52199363</b>  | <b>2.59E-03</b> |
| GRM1            | chr6         | 146388044        | 146394853        | 6.07E-04        |
| <b>GRM7</b>     | <b>chr3</b>  | <b>6872719</b>   | <b>6880482</b>   | <b>1.63E-05</b> |
| <b>GRPR</b>     | <b>chrX</b>  | <b>16046640</b>  | <b>16054432</b>  | <b>9.86E-03</b> |
| <b>GSC</b>      | <b>chr14</b> | <b>94303729</b>  | <b>94311646</b>  | <b>5.92E-03</b> |
| <b>HAP1</b>     | <b>chr17</b> | <b>37142033</b>  | <b>37149847</b>  | <b>5.87E-03</b> |
| <b>HDAC6</b>    | <b>chrX</b>  | <b>48539924</b>  | <b>48568152</b>  | <b>8.74E-03</b> |
| <b>HNRPD</b>    | <b>chr4</b>  | <b>83511336</b>  | <b>83518809</b>  | <b>9.25E-03</b> |
| <b>HOXC10</b>   | <b>chr12</b> | <b>52659869</b>  | <b>52670337</b>  | <b>5.47E-04</b> |
| <b>HOXC13</b>   | <b>chr12</b> | <b>52613426</b>  | <b>52621431</b>  | <b>3.53E-05</b> |
| <b>HPGD</b>     | <b>chr4</b>  | <b>175677827</b> | <b>175685698</b> | <b>6.05E-04</b> |

|                       |              |                  |                  |                 |
|-----------------------|--------------|------------------|------------------|-----------------|
| <b>hsa-mir-125b-1</b> | <b>chr11</b> | <b>121473461</b> | <b>121481220</b> | <b>8.74E-03</b> |
| <b>HSCB</b>           | <b>chr22</b> | <b>27468154</b>  | <b>27472034</b>  | <b>3.42E-05</b> |
| IGBP1                 | chrX         | 69265491         | 69272391         | 2.53E-04        |
| <b>IL17A</b>          | <b>chr6</b>  | <b>52153710</b>  | <b>52161460</b>  | <b>8.63E-05</b> |
| <b>IL2</b>            | <b>chr4</b>  | <b>123594562</b> | <b>123600373</b> | <b>4.86E-03</b> |
| <b>IL27</b>           | <b>chr16</b> | <b>28424058</b>  | <b>28431137</b>  | <b>6.88E-03</b> |
| <b>IL4I1</b>          | <b>chr19</b> | <b>55089433</b>  | <b>55097079</b>  | <b>2.57E-03</b> |
| <b>ITCH</b>           | <b>chr20</b> | <b>32413474</b>  | <b>32562865</b>  | <b>8.42E-03</b> |
| <b>ITFG2</b>          | <b>chr12</b> | <b>2786772</b>   | <b>2793831</b>   | <b>1.06E-03</b> |
| <b>ITIH1</b>          | <b>chr3</b>  | <b>52786702</b>  | <b>52801103</b>  | <b>2.05E-04</b> |
| <b>ITPKB</b>          | <b>chr1</b>  | <b>224989444</b> | <b>224996200</b> | <b>1.84E-03</b> |
| <b>KCNIP4</b>         | <b>chr4</b>  | <b>20490977</b>  | <b>21563714</b>  | <b>5.75E-03</b> |
| <b>KCTD17</b>         | <b>chr22</b> | <b>35772056</b>  | <b>35780226</b>  | <b>8.65E-03</b> |
| <b>KIAA0182</b>       | <b>chr16</b> | <b>84197082</b>  | <b>84206865</b>  | <b>5.48E-03</b> |
| <b>KLF10</b>          | <b>chr8</b>  | <b>103732779</b> | <b>103742600</b> | <b>4.58E-03</b> |
| <b>KLF4</b>           | <b>chr9</b>  | <b>109288846</b> | <b>109296864</b> | <b>5.67E-05</b> |
| <b>KLHL14</b>         | <b>chr18</b> | <b>28604543</b>  | <b>28612390</b>  | <b>2.41E-03</b> |
| <b>KLHL2</b>          | <b>chr4</b>  | <b>166342905</b> | <b>166463770</b> | <b>7.56E-03</b> |
| <b>KLHL30</b>         | <b>chr2</b>  | <b>238708684</b> | <b>238716605</b> | <b>2.02E-03</b> |
| <b>KLHL5</b>          | <b>chr4</b>  | <b>38735230</b>  | <b>38743041</b>  | <b>8.55E-03</b> |
| <b>KLHL6</b>          | <b>chr3</b>  | <b>184753606</b> | <b>184761558</b> | <b>2.47E-04</b> |
| <b>KRT6C</b>          | <b>chr12</b> | <b>51171443</b>  | <b>51172589</b>  | <b>3.68E-03</b> |
| <b>L3MBTL4</b>        | <b>chr18</b> | <b>6299272</b>   | <b>6409076</b>   | <b>2.50E-03</b> |
| <b>LGTN</b>           | <b>chr1</b>  | <b>204850041</b> | <b>204855737</b> | <b>2.75E-03</b> |
| <b>LMO4</b>           | <b>chr1</b>  | <b>87561350</b>  | <b>87572781</b>  | <b>7.15E-04</b> |
| <b>LYN</b>            | <b>chr8</b>  | <b>56949513</b>  | <b>56957701</b>  | <b>1.96E-04</b> |
| MAP2K7                | chr19        | 7873549          | 7877078          | 3.84E-04        |
| MAP3K5                | chr6         | 137153022        | 137158517        | 2.66E-05        |
| <b>MAPRE2</b>         | <b>chr18</b> | <b>30870014</b>  | <b>30878018</b>  | <b>2.31E-03</b> |
| MARCKS                | chr6         | 114281502        | 114287957        | 3.19E-04        |
| <b>MAT1A</b>          | <b>chr10</b> | <b>82036829</b>  | <b>82044570</b>  | <b>8.43E-03</b> |
| <b>MC2R</b>           | <b>chr18</b> | <b>13873037</b>  | <b>13910778</b>  | <b>8.02E-04</b> |
| <b>MEIS1</b>          | <b>chr2</b>  | <b>66510564</b>  | <b>66518628</b>  | <b>6.31E-04</b> |
| <b>MEN1</b>           | <b>chr11</b> | <b>64327558</b>  | <b>64335014</b>  | <b>1.64E-04</b> |
| METAP1                | chr4         | 100170324        | 100176726        | 3.18E-04        |
| <b>MGC26733</b>       | <b>chr2</b>  | <b>98064908</b>  | <b>98230344</b>  | <b>6.24E-04</b> |
| <b>MGMT</b>           | <b>chr10</b> | <b>131150140</b> | <b>131157952</b> | <b>4.56E-03</b> |
| <b>MIER1</b>          | <b>chr1</b>  | <b>67163375</b>  | <b>67171046</b>  | <b>8.94E-04</b> |

|                 |              |                  |                  |                 |
|-----------------|--------------|------------------|------------------|-----------------|
| <b>MITF</b>     | <b>chr3</b>  | <b>69865806</b>  | <b>70070929</b>  | <b>7.73E-05</b> |
| <b>MMP12</b>    | <b>chr11</b> | <b>102248846</b> | <b>102256141</b> | <b>8.55E-03</b> |
| <b>MORC2</b>    | <b>chr22</b> | <b>29691428</b>  | <b>29699618</b>  | <b>9.12E-03</b> |
| <b>MSRB2</b>    | <b>chr10</b> | <b>23419235</b>  | <b>23460940</b>  | <b>1.94E-05</b> |
| <b>NCK2</b>     | <b>chr2</b>  | <b>105829394</b> | <b>105836285</b> | <b>7.59E-03</b> |
| <b>NDST4</b>    | <b>chr4</b>  | <b>116252619</b> | <b>116259865</b> | <b>6.55E-03</b> |
| <b>NEFM</b>     | <b>chr8</b>  | <b>24821804</b>  | <b>24829520</b>  | <b>5.40E-04</b> |
| <b>NFATC1</b>   | <b>chr18</b> | <b>75253029</b>  | <b>75263841</b>  | <b>1.48E-04</b> |
| <b>NOL4</b>     | <b>chr18</b> | <b>30054784</b>  | <b>30061524</b>  | <b>1.21E-03</b> |
| <b>NOX4</b>     | <b>chr11</b> | <b>88861718</b>  | <b>88869890</b>  | <b>9.57E-03</b> |
| <b>NR2E1</b>    | <b>chr6</b>  | <b>108588654</b> | <b>108597134</b> | <b>2.38E-04</b> |
| <b>NRK</b>      | <b>chrX</b>  | <b>104947942</b> | <b>104955594</b> | <b>7.82E-04</b> |
| <b>NUDT2</b>    | <b>chr9</b>  | <b>34314130</b>  | <b>34331459</b>  | <b>4.21E-04</b> |
| <b>NUFIP2</b>   | <b>chr17</b> | <b>24642755</b>  | <b>24649732</b>  | <b>8.74E-03</b> |
| <b>OR9Q1</b>    | <b>chr11</b> | <b>57641047</b>  | <b>57705597</b>  | <b>4.05E-03</b> |
| <b>OTOA</b>     | <b>chr16</b> | <b>21597336</b>  | <b>21626076</b>  | <b>6.54E-04</b> |
| <b>PAN3</b>     | <b>chr13</b> | <b>27641279</b>  | <b>27648649</b>  | <b>4.03E-04</b> |
| <b>PAX2</b>     | <b>chr10</b> | <b>102489841</b> | <b>102498514</b> | <b>1.57E-04</b> |
| <b>PAX7</b>     | <b>chr1</b>  | <b>18824807</b>  | <b>18833022</b>  | <b>4.24E-04</b> |
| <b>PCDH7</b>    | <b>chr4</b>  | <b>30325765</b>  | <b>30333629</b>  | <b>6.10E-04</b> |
| <b>PCDHGA12</b> | <b>chr5</b>  | <b>140784943</b> | <b>140792948</b> | <b>7.68E-04</b> |
| <b>PCID1</b>    | <b>chr11</b> | <b>32556607</b>  | <b>32564063</b>  | <b>2.05E-03</b> |
| <b>PDLIM5</b>   | <b>chr4</b>  | <b>95587209</b>  | <b>95594593</b>  | <b>1.43E-06</b> |
| <b>PIP5K2A</b>  | <b>chr10</b> | <b>23041096</b>  | <b>23048726</b>  | <b>4.35E-05</b> |
| <b>PLAGL2</b>   | <b>chr20</b> | <b>30239362</b>  | <b>30259110</b>  | <b>9.04E-04</b> |
| <b>PLN</b>      | <b>chr6</b>  | <b>118971500</b> | <b>118987764</b> | <b>7.59E-03</b> |
| <b>PPP2R3A</b>  | <b>chr3</b>  | <b>137165644</b> | <b>137226608</b> | <b>2.01E-04</b> |
| <b>PRC1</b>     | <b>chr15</b> | <b>89336939</b>  | <b>89342667</b>  | <b>2.19E-04</b> |
| <b>PRDM5</b>    | <b>chr4</b>  | <b>122060791</b> | <b>122066481</b> | <b>1.84E-04</b> |
| <b>PRLHR</b>    | <b>chr10</b> | <b>120342455</b> | <b>120350300</b> | <b>1.35E-04</b> |
| <b>PRMT3</b>    | <b>chr11</b> | <b>20361912</b>  | <b>20367973</b>  | <b>6.73E-05</b> |
| <b>PTGDR</b>    | <b>chr14</b> | <b>51798860</b>  | <b>51806320</b>  | <b>6.02E-04</b> |
| <b>PTPRT</b>    | <b>chr20</b> | <b>41249397</b>  | <b>41257020</b>  | <b>8.40E-03</b> |
| <b>PVRL2</b>    | <b>chr19</b> | <b>50036396</b>  | <b>50083184</b>  | <b>5.41E-03</b> |
| <b>R3HDM1</b>   | <b>chr2</b>  | <b>136005646</b> | <b>136141865</b> | <b>9.56E-03</b> |
| <b>RAB28</b>    | <b>chr4</b>  | <b>13092357</b>  | <b>13100571</b>  | <b>6.85E-03</b> |
| <b>RAB30</b>    | <b>chr11</b> | <b>82458231</b>  | <b>82465717</b>  | <b>7.68E-03</b> |
| <b>RABGAP1</b>  | <b>chr9</b>  | <b>124743174</b> | <b>124916451</b> | <b>8.45E-03</b> |

|                   |              |                  |                  |                 |
|-------------------|--------------|------------------|------------------|-----------------|
| <b>RABGAP1L</b>   | <b>chr1</b>  | <b>172390394</b> | <b>172686075</b> | <b>5.16E-03</b> |
| <b>RASL11B</b>    | <b>chr4</b>  | <b>53417780</b>  | <b>53425823</b>  | <b>5.04E-04</b> |
| <b>RASSF3</b>     | <b>chr12</b> | <b>63285471</b>  | <b>63292522</b>  | <b>6.86E-03</b> |
| <b>RASSF8</b>     | <b>chr12</b> | <b>25998953</b>  | <b>26005641</b>  | <b>5.73E-04</b> |
| <b>RICTOR</b>     | <b>chr5</b>  | <b>39107897</b>  | <b>39113613</b>  | <b>5.19E-04</b> |
| <b>RNF103</b>     | <b>chr2</b>  | <b>86701144</b>  | <b>86708020</b>  | <b>8.45E-03</b> |
| <b>RNF122</b>     | <b>chr8</b>  | <b>33542054</b>  | <b>33549671</b>  | <b>9.85E-03</b> |
| <b>RNF130</b>     | <b>chr5</b>  | <b>179372715</b> | <b>179436732</b> | <b>3.41E-04</b> |
| <b>RNF17</b>      | <b>chr13</b> | <b>24231354</b>  | <b>24304582</b>  | <b>5.55E-03</b> |
| <b>RSPO2</b>      | <b>chr8</b>  | <b>109160982</b> | <b>109168013</b> | <b>2.61E-04</b> |
| <b>RUNX1T1</b>    | <b>chr8</b>  | <b>93096291</b>  | <b>93182090</b>  | <b>3.63E-04</b> |
| <b>SALL1</b>      | <b>chr16</b> | <b>49740247</b>  | <b>49748161</b>  | <b>3.57E-04</b> |
| <b>SAMSN1</b>     | <b>chr21</b> | <b>14837999</b>  | <b>14845840</b>  | <b>8.76E-03</b> |
| <b>SCGB1D1</b>    | <b>chr11</b> | <b>61711612</b>  | <b>61716640</b>  | <b>2.68E-03</b> |
| <b>SEMA4D</b>     | <b>chr9</b>  | <b>91282126</b>  | <b>91289928</b>  | <b>6.75E-04</b> |
| <b>SERTAD2</b>    | <b>chr2</b>  | <b>64731894</b>  | <b>64739516</b>  | <b>1.30E-05</b> |
| <b>SFRS15</b>     | <b>chr21</b> | <b>32023827</b>  | <b>32031453</b>  | <b>8.52E-03</b> |
| <b>SFRS3</b>      | <b>chr6</b>  | <b>36665106</b>  | <b>36672411</b>  | <b>1.18E-04</b> |
| <b>SIAH1</b>      | <b>chr16</b> | <b>46954747</b>  | <b>46982117</b>  | <b>2.40E-03</b> |
| <b>SLC2A4</b>     | <b>chr17</b> | <b>7122640</b>   | <b>7128427</b>   | <b>9.30E-04</b> |
| <b>SLIT1</b>      | <b>chr10</b> | <b>98932959</b>  | <b>98940303</b>  | <b>3.46E-03</b> |
| <b>SMAD7</b>      | <b>chr18</b> | <b>44728524</b>  | <b>44736598</b>  | <b>6.51E-05</b> |
| <b>SNX24</b>      | <b>chr5</b>  | <b>122205841</b> | <b>122211447</b> | <b>1.48E-04</b> |
| <b>SORBS1</b>     | <b>chr10</b> | <b>97185054</b>  | <b>97316243</b>  | <b>1.80E-04</b> |
| <b>SOX5</b>       | <b>chr12</b> | <b>23991389</b>  | <b>24612164</b>  | <b>3.85E-03</b> |
| <b>SOX6</b>       | <b>chr11</b> | <b>16378944</b>  | <b>16459282</b>  | <b>2.13E-04</b> |
| <b>SPG20</b>      | <b>chr13</b> | <b>35805495</b>  | <b>35824248</b>  | <b>3.64E-04</b> |
| <b>SSTR4</b>      | <b>chr20</b> | <b>22958743</b>  | <b>22966641</b>  | <b>4.64E-04</b> |
| <b>ST6GALNAC3</b> | <b>chr1</b>  | <b>76307640</b>  | <b>76315346</b>  | <b>3.13E-05</b> |
| <b>STAG2</b>      | <b>chrX</b>  | <b>122919322</b> | <b>122986516</b> | <b>6.21E-04</b> |
| <b>STARD13</b>    | <b>chr13</b> | <b>32655725</b>  | <b>32763172</b>  | <b>3.54E-03</b> |
| <b>STATIP1</b>    | <b>chr18</b> | <b>31963993</b>  | <b>31968819</b>  | <b>6.04E-03</b> |
| <b>STOM</b>       | <b>chr9</b>  | <b>123169762</b> | <b>123177476</b> | <b>5.85E-03</b> |
| <b>TACC3</b>      | <b>chr4</b>  | <b>1693044</b>   | <b>1698204</b>   | <b>6.14E-04</b> |
| <b>TAS2R7</b>     | <b>chr12</b> | <b>10844147</b>  | <b>10849899</b>  | <b>3.51E-05</b> |
| <b>TCF21</b>      | <b>chr6</b>  | <b>134246927</b> | <b>134254747</b> | <b>4.90E-05</b> |
| <b>TCF7L2</b>     | <b>chr10</b> | <b>114694749</b> | <b>114702928</b> | <b>2.77E-03</b> |
| <b>TCL6</b>       | <b>chr14</b> | <b>95194152</b>  | <b>95203571</b>  | <b>4.50E-04</b> |

|                |              |                  |                  |                 |
|----------------|--------------|------------------|------------------|-----------------|
| <b>TEX13B</b>  | <b>chrX</b>  | <b>107109621</b> | <b>107115901</b> | <b>7.52E-04</b> |
| <b>THBD</b>    | <b>chr20</b> | <b>22975907</b>  | <b>22982857</b>  | <b>9.80E-03</b> |
| <b>TLE3</b>    | <b>chr15</b> | <b>68173699</b>  | <b>68182765</b>  | <b>5.48E-03</b> |
| TMED3          | chr15        | 77385707         | 77392715         | 3.94E-04        |
| <b>TMEM17</b>  | <b>chr2</b>  | <b>62584425</b>  | <b>62592297</b>  | <b>3.29E-04</b> |
| TSHZ3          | chr19        | 36459632         | 36467510         | 9.23E-04        |
| <b>TSPY1</b>   | <b>chrY</b>  | <b>9270695</b>   | <b>9975448</b>   | <b>3.65E-03</b> |
| <b>TTC14</b>   | <b>chr3</b>  | <b>181797316</b> | <b>181805128</b> | <b>8.74E-03</b> |
| <b>TWF2</b>    | <b>chr3</b>  | <b>52237659</b>  | <b>52248179</b>  | <b>1.88E-07</b> |
| <b>TXNDC10</b> | <b>chr18</b> | <b>64530956</b>  | <b>64538834</b>  | <b>3.62E-04</b> |
| <b>TXNDC3</b>  | <b>chr7</b>  | <b>37849871</b>  | <b>37857133</b>  | <b>3.94E-04</b> |
| <b>UBE2I</b>   | <b>chr16</b> | <b>1293821</b>   | <b>1306356</b>   | <b>9.59E-04</b> |
| <b>UPF1</b>    | <b>chr19</b> | <b>18799619</b>  | <b>18806398</b>  | <b>2.68E-03</b> |
| <b>UTS2</b>    | <b>chr1</b>  | <b>7833210</b>   | <b>7841176</b>   | <b>7.97E-04</b> |
| VAX1           | chr10        | 118885157        | 118893254        | 9.59E-04        |
| <b>VGLL3</b>   | <b>chr3</b>  | <b>87120644</b>  | <b>87128306</b>  | <b>7.50E-03</b> |
| <b>VPS35</b>   | <b>chr16</b> | <b>45275797</b>  | <b>45280444</b>  | <b>5.68E-03</b> |
| <b>WWOX</b>    | <b>chr16</b> | <b>76685605</b>  | <b>76693698</b>  | <b>3.03E-03</b> |
| <b>ZBTB16</b>  | <b>chr11</b> | <b>113430193</b> | <b>113636269</b> | <b>5.66E-05</b> |
| <b>ZBTB2</b>   | <b>chr6</b>  | <b>151752230</b> | <b>151759706</b> | <b>6.86E-04</b> |
| <b>ZDHHC6</b>  | <b>chr10</b> | <b>114191649</b> | <b>114196563</b> | <b>6.51E-03</b> |
| <b>ZFP36</b>   | <b>chr19</b> | <b>44583835</b>  | <b>44591634</b>  | <b>2.02E-03</b> |
| ZIC3           | chrX         | 136470489        | 136479034        | 1.55E-04        |
| ZMAT2          | chr5         | 140059049        | 140062704        | 4.04E-05        |
| ZNF157         | chrX         | 47110271         | 47115056         | 4.66E-05        |
| <b>ZNF44</b>   | <b>chr19</b> | <b>12264345</b>  | <b>12271193</b>  | <b>5.01E-04</b> |
| <b>ZNF451</b>  | <b>chr6</b>  | <b>57058090</b>  | <b>57142944</b>  | <b>1.04E-04</b> |
| ZNF533         | chr2         | 180432074        | 180439579        | 7.82E-05        |
| <b>ZNF667</b>  | <b>chr19</b> | <b>61678252</b>  | <b>61685739</b>  | <b>3.66E-03</b> |

Footnotes:

1. AR target genes in Huh7 cells identified by ChIP-chip. Common targets identified in both HCC cell lines are bolded.
2. The chromosome location and genomic coordinates of the probe in the Agilent human ChIP-chip array that shows significant AR binding in HCC cells by the ChIP Analytics software.
3. The minimal  $P[Xbar]$  value of the probes corresponding to the AR-bound genes. A gene promoter was considered as positive for AR binding if the probes have  $P[Xbar] < 10^{-3}$ .

PLC5 cell line

| <sup>1</sup> Gene | <sup>2</sup> Chromosome | <sup>2</sup> Start | <sup>2</sup> End | <sup>3</sup> MinP[x] |
|-------------------|-------------------------|--------------------|------------------|----------------------|
| ACA36             | chrX                    | 153644412          | 153646868        | 1.46E-04             |
| <b>ACE2</b>       | <b>chrX</b>             | <b>15526648</b>    | <b>15534535</b>  | <b>7.60E-03</b>      |
| <b>ADAR</b>       | <b>chr1</b>             | <b>152844950</b>   | <b>152871257</b> | <b>4.02E-04</b>      |
| ALAS2             | chrX                    | 55066889           | 55078786         | 2.74E-05             |
| <b>AMN1</b>       | <b>chr12</b>            | <b>31770868</b>    | <b>31778797</b>  | <b>3.62E-04</b>      |
| ANKRD27           | chr19                   | 37852866           | 37857850         | 9.45E-04             |
| <b>APAF1</b>      | <b>chr12</b>            | <b>97563218</b>    | <b>97568786</b>  | <b>5.10E-04</b>      |
| <b>ARHGEF18</b>   | <b>chr19</b>            | <b>7346362</b>     | <b>7413527</b>   | <b>8.85E-04</b>      |
| <b>ARL4D</b>      | <b>chr17</b>            | <b>38827000</b>    | <b>38835034</b>  | <b>4.76E-04</b>      |
| ASB12             | chrX                    | 63360334           | 63367558         | 9.29E-05             |
| <b>ATP11C</b>     | <b>chrX</b>             | <b>138739520</b>   | <b>138747591</b> | <b>2.02E-04</b>      |
| <b>ATP8A2</b>     | <b>chr13</b>            | <b>24935793</b>    | <b>24942454</b>  | <b>6.45E-05</b>      |
| <b>B3GALT6</b>    | <b>chr1</b>             | <b>1157693</b>     | <b>1162786</b>   | <b>5.48E-03</b>      |
| <b>BACH2</b>      | <b>chr6</b>             | <b>91060808</b>    | <b>91068712</b>  | <b>6.68E-05</b>      |
| <b>BANP</b>       | <b>chr16</b>            | <b>86537656</b>    | <b>86566623</b>  | <b>2.52E-05</b>      |
| <b>BCL11B</b>     | <b>chr14</b>            | <b>98805000</b>    | <b>98813103</b>  | <b>7.75E-04</b>      |
| <b>BOLA3</b>      | <b>chr2</b>             | <b>74210871</b>    | <b>74233956</b>  | <b>6.07E-04</b>      |
| BTBD12            | chr16                   | 3571184            | 3591118          | 1.30E-04             |
| <b>C10orf22</b>   | <b>chr10</b>            | <b>64229206</b>    | <b>64237456</b>  | <b>4.45E-04</b>      |
| <b>C11orf58</b>   | <b>chr11</b>            | <b>16712375</b>    | <b>16719418</b>  | <b>8.88E-04</b>      |
| <b>C11orf63</b>   | <b>chr11</b>            | <b>122253347</b>   | <b>122264241</b> | <b>4.88E-05</b>      |
| <b>C14orf93</b>   | <b>chr14</b>            | <b>22526007</b>    | <b>22554690</b>  | <b>2.77E-04</b>      |
| C1R               | chr12                   | 7056942            | 7138134          | 2.81E-05             |
| <b>C21orf45</b>   | <b>chr21</b>            | <b>32571516</b>    | <b>32575919</b>  | <b>2.00E-04</b>      |
| <b>C2orf29</b>    | <b>chr2</b>             | <b>101230597</b>   | <b>101237934</b> | <b>9.98E-04</b>      |
| <b>C4orf15</b>    | <b>chr4</b>             | <b>2200333</b>     | <b>2218985</b>   | <b>5.74E-03</b>      |
| CA10              | chr17                   | 47588732           | 47597805         | 1.49E-04             |
| <b>CABP7</b>      | <b>chr22</b>            | <b>28440904</b>    | <b>28448865</b>  | <b>2.53E-04</b>      |
| CABYR             | chr18                   | 19967495           | 19975890         | 3.41E-06             |
| CBLL1             | chr7                    | 107167982          | 107174249        | 2.11E-05             |
| CCDC120           | chrX                    | 48797960           | 48805801         | 7.86E-05             |
| <b>CCND1</b>      | <b>chr11</b>            | <b>69159563</b>    | <b>69167767</b>  | <b>7.41E-04</b>      |
| <b>CCNF</b>       | <b>chr16</b>            | <b>2414051</b>     | <b>2448669</b>   | <b>7.46E-03</b>      |
| <b>CCRK</b>       | <b>chr9</b>             | <b>89777119</b>    | <b>89782729</b>  | <b>2.03E-05</b>      |



|                |              |                  |                  |                 |
|----------------|--------------|------------------|------------------|-----------------|
| <b>CD164</b>   | <b>chr6</b>  | <b>109807871</b> | <b>109815857</b> | <b>7.59E-03</b> |
| <b>CD3E</b>    | <b>chr11</b> | <b>117677776</b> | <b>117683219</b> | <b>8.73E-03</b> |
| CDC42EP4       | chr17        | 68817206         | 68825145         | 5.28E-04        |
| <b>CDH2</b>    | <b>chr18</b> | <b>24008571</b>  | <b>24016616</b>  | <b>3.13E-05</b> |
| <b>CDH24</b>   | <b>chr14</b> | <b>22592434</b>  | <b>22600650</b>  | <b>6.54E-04</b> |
| <b>CDH8</b>    | <b>chr16</b> | <b>60625209</b>  | <b>60633709</b>  | <b>8.70E-03</b> |
| <b>CDK5R2</b>  | <b>chr2</b>  | <b>219527554</b> | <b>219535227</b> | <b>8.79E-05</b> |
| <b>CDK6</b>    | <b>chr7</b>  | <b>92298051</b>  | <b>92306286</b>  | <b>1.88E-04</b> |
| <b>CDKN1B</b>  | <b>chr12</b> | <b>12756098</b>  | <b>12764388</b>  | <b>9.51E-05</b> |
| <b>CGNL1</b>   | <b>chr15</b> | <b>55450860</b>  | <b>55519987</b>  | <b>5.70E-03</b> |
| <b>CHGB</b>    | <b>chr20</b> | <b>5834652</b>   | <b>5842805</b>   | <b>4.87E-04</b> |
| <b>CHODL</b>   | <b>chr21</b> | <b>18533713</b>  | <b>18541932</b>  | <b>8.37E-03</b> |
| <b>CIAO1</b>   | <b>chr2</b>  | <b>96295590</b>  | <b>96300874</b>  | <b>3.94E-05</b> |
| CLGN           | chr4         | 141566657        | 141571070        | 9.51E-05        |
| <b>CLIC6</b>   | <b>chr21</b> | <b>34958148</b>  | <b>34965915</b>  | <b>8.23E-05</b> |
| <b>CLUL1</b>   | <b>chr18</b> | <b>584836</b>    | <b>609132</b>    | <b>2.30E-04</b> |
| <b>CNTRF</b>   | <b>chr9</b>  | <b>34577338</b>  | <b>34584652</b>  | <b>2.43E-04</b> |
| <b>CPXCR1</b>  | <b>chrX</b>  | <b>87883406</b>  | <b>87891388</b>  | <b>1.06E-04</b> |
| <b>CPZ</b>     | <b>chr4</b>  | <b>8640399</b>   | <b>8647960</b>   | <b>8.74E-05</b> |
| CRSP2          | chrX         | 40392486         | 40484955         | 9.85E-04        |
| CRYGB          | chr2         | 208718064        | 208723252        | 1.16E-04        |
| <b>CSNK1D</b>  | <b>chr17</b> | <b>77822118</b>  | <b>77830310</b>  | <b>3.38E-04</b> |
| <b>CTGF</b>    | <b>chr6</b>  | <b>132311731</b> | <b>132319190</b> | <b>7.25E-04</b> |
| CX3CR1         | chr3         | 39294235         | 39301590         | 1.17E-05        |
| <b>CYR61</b>   | <b>chr1</b>  | <b>85813751</b>  | <b>85821729</b>  | <b>8.65E-05</b> |
| DCP1B          | chr12        | 1981466          | 1989372          | 4.68E-04        |
| <b>DDX31</b>   | <b>chr9</b>  | <b>134535770</b> | <b>134540982</b> | <b>4.87E-03</b> |
| DENND3         | chr8         | 142202490        | 142210376        | 7.55E-04        |
| DHRS3          | chr1         | 12597570         | 12605805         | 1.12E-04        |
| DHX36          | chr3         | 155522603        | 155526544        | 7.18E-04        |
| <b>DIS3L</b>   | <b>chr15</b> | <b>64367247</b>  | <b>64375491</b>  | <b>4.89E-04</b> |
| DMRT3          | chr9         | 961509           | 969455           | 1.16E-04        |
| <b>DNAJC5G</b> | <b>chr2</b>  | <b>27350115</b>  | <b>27357824</b>  | <b>5.88E-03</b> |
| <b>DPPA3</b>   | <b>chr12</b> | <b>7749947</b>   | <b>7757668</b>   | <b>3.26E-04</b> |
| <b>DRD3</b>    | <b>chr3</b>  | <b>115371150</b> | <b>115384135</b> | <b>1.73E-05</b> |
| <b>DSCR6</b>   | <b>chr21</b> | <b>37295531</b>  | <b>37303244</b>  | <b>4.20E-05</b> |
| <b>DSCR9</b>   | <b>chr21</b> | <b>37497423</b>  | <b>37515952</b>  | <b>9.23E-05</b> |
| <b>DTNA</b>    | <b>chr18</b> | <b>30321780</b>  | <b>30654712</b>  | <b>5.99E-03</b> |

|                 |              |                  |                  |                 |
|-----------------|--------------|------------------|------------------|-----------------|
| <b>DUSP21</b>   | <b>chrX</b>  | <b>44585374</b>  | <b>44590838</b>  | <b>2.31E-05</b> |
| <b>DYRK1A</b>   | <b>chr21</b> | <b>37656075</b>  | <b>37716752</b>  | <b>1.09E-04</b> |
| <b>EGFLAM</b>   | <b>chr5</b>  | <b>38290135</b>  | <b>38483905</b>  | <b>7.79E-04</b> |
| <b>EGR2</b>     | <b>chr10</b> | <b>64243403</b>  | <b>64251556</b>  | <b>3.86E-04</b> |
| <b>EIF1AX</b>   | <b>chrX</b>  | <b>20067579</b>  | <b>20074596</b>  | <b>3.79E-03</b> |
| <b>ELOVL4</b>   | <b>chr6</b>  | <b>80711295</b>  | <b>80719368</b>  | <b>6.59E-04</b> |
| <b>ENDOGL1</b>  | <b>chr3</b>  | <b>38509729</b>  | <b>38515292</b>  | <b>5.50E-03</b> |
| <b>ERH</b>      | <b>chr14</b> | <b>68930767</b>  | <b>68934716</b>  | <b>4.53E-03</b> |
| <b>ERN2</b>     | <b>chr16</b> | <b>23629830</b>  | <b>23637654</b>  | <b>3.84E-04</b> |
| <b>ESCO1</b>    | <b>chr18</b> | <b>17432281</b>  | <b>17435629</b>  | <b>7.74E-04</b> |
| <b>EVI1</b>     | <b>chr3</b>  | <b>170344352</b> | <b>170352485</b> | <b>7.82E-03</b> |
| <b>EXOSC3</b>   | <b>chr9</b>  | <b>37772605</b>  | <b>37780549</b>  | <b>5.42E-03</b> |
| <b>EXOSC5</b>   | <b>chr19</b> | <b>46590446</b>  | <b>46595066</b>  | <b>1.73E-05</b> |
| <b>FAM112A</b>  | <b>chr20</b> | <b>41786315</b>  | <b>41794567</b>  | <b>4.32E-04</b> |
| <b>FAM45B</b>   | <b>chr10</b> | <b>120853685</b> | <b>129457739</b> | <b>3.28E-06</b> |
| <b>FAM62A</b>   | <b>chr12</b> | <b>54803103</b>  | <b>54810819</b>  | <b>8.68E-04</b> |
| <b>FBS1</b>     | <b>chr16</b> | <b>30578866</b>  | <b>30586483</b>  | <b>6.15E-04</b> |
| <b>FBXO15</b>   | <b>chr18</b> | <b>69961442</b>  | <b>69965896</b>  | <b>1.86E-04</b> |
| <b>FBXO8</b>    | <b>chr4</b>  | <b>175442080</b> | <b>175445819</b> | <b>5.98E-04</b> |
| <b>FCAR</b>     | <b>chr19</b> | <b>60071948</b>  | <b>60079204</b>  | <b>7.94E-04</b> |
| <b>FGF14</b>    | <b>chr13</b> | <b>101364838</b> | <b>101857442</b> | <b>3.12E-05</b> |
| <b>FGFR1</b>    | <b>chr8</b>  | <b>38432513</b>  | <b>38450798</b>  | <b>3.19E-05</b> |
| <b>FLI1</b>     | <b>chr11</b> | <b>128063784</b> | <b>128071748</b> | <b>5.35E-04</b> |
| <b>FLJ21127</b> | <b>chr12</b> | <b>109530895</b> | <b>109538392</b> | <b>7.24E-04</b> |
| <b>FLJ45121</b> | <b>chr16</b> | <b>87330769</b>  | <b>87335324</b>  | <b>2.71E-04</b> |
| <b>FLT1</b>     | <b>chr13</b> | <b>27964543</b>  | <b>27972661</b>  | <b>7.41E-03</b> |
| <b>FLT3</b>     | <b>chr13</b> | <b>27570504</b>  | <b>27576660</b>  | <b>4.79E-03</b> |
| <b>FOS</b>      | <b>chr14</b> | <b>74809900</b>  | <b>74817771</b>  | <b>6.12E-05</b> |
| <b>FOXA2</b>    | <b>chr20</b> | <b>22510624</b>  | <b>22519425</b>  | <b>4.78E-05</b> |
| <b>GABRA3</b>   | <b>chrX</b>  | <b>151308976</b> | <b>151373033</b> | <b>9.83E-03</b> |
| <b>GADD45B</b>  | <b>chr19</b> | <b>2423856</b>   | <b>2429726</b>   | <b>8.72E-03</b> |
| <b>GATA5</b>    | <b>chr20</b> | <b>60481532</b>  | <b>60489851</b>  | <b>2.90E-04</b> |
| <b>GDPD2</b>    | <b>chrX</b>  | <b>69557553</b>  | <b>69562431</b>  | <b>7.48E-03</b> |
| <b>GNAI2</b>    | <b>chr3</b>  | <b>50238692</b>  | <b>50251219</b>  | <b>6.61E-04</b> |
| <b>GPBP1</b>    | <b>chr5</b>  | <b>56503860</b>  | <b>56508171</b>  | <b>8.03E-05</b> |
| <b>GPR87</b>    | <b>chr3</b>  | <b>152514964</b> | <b>152522610</b> | <b>6.41E-04</b> |
| <b>GRIA4</b>    | <b>chr11</b> | <b>104980777</b> | <b>104989227</b> | <b>8.73E-03</b> |
| <b>GRIN2A</b>   | <b>chr16</b> | <b>10179347</b>  | <b>10186292</b>  | <b>9.76E-05</b> |

|                       |              |                  |                  |                 |
|-----------------------|--------------|------------------|------------------|-----------------|
| <b>GRLF1</b>          | <b>chr19</b> | <b>52108410</b>  | <b>52199363</b>  | <b>8.75E-04</b> |
| <b>GRM7</b>           | <b>chr3</b>  | <b>6872719</b>   | <b>6880482</b>   | <b>3.66E-03</b> |
| <b>GRPR</b>           | <b>chrX</b>  | <b>16046640</b>  | <b>16054432</b>  | <b>2.44E-04</b> |
| <b>GSC</b>            | <b>chr14</b> | <b>94303729</b>  | <b>94311646</b>  | <b>6.86E-04</b> |
| GSN                   | chr9         | 123064818        | 123104361        | 1.20E-04        |
| <b>HAP1</b>           | <b>chr17</b> | <b>37142033</b>  | <b>37149847</b>  | <b>9.82E-04</b> |
| HARS2                 | chr20        | 18512387         | 18518738         | 5.31E-04        |
| <b>HDAC6</b>          | <b>chrX</b>  | <b>48539924</b>  | <b>48568152</b>  | <b>2.15E-04</b> |
| HHLA3                 | chr1         | 70593103         | 70598444         | 9.83E-04        |
| HIST1H2AG             | chr6         | 27209340         | 27210300         | 6.67E-05        |
| <b>HNRPD</b>          | <b>chr4</b>  | <b>83511336</b>  | <b>83518809</b>  | <b>1.40E-04</b> |
| HOXA10                | chr7         | 27176821         | 27187227         | 9.36E-04        |
| <b>HOXC10</b>         | <b>chr12</b> | <b>52659869</b>  | <b>52670337</b>  | <b>2.57E-05</b> |
| <b>HOXC13</b>         | <b>chr12</b> | <b>52613426</b>  | <b>52621431</b>  | <b>4.89E-03</b> |
| <b>HPGD</b>           | <b>chr4</b>  | <b>175677827</b> | <b>175685698</b> | <b>7.48E-03</b> |
| HS3ST5                | chr6         | 114488200        | 114496140        | 7.06E-05        |
| <b>hsa-mir-125b-1</b> | <b>chr11</b> | <b>121473461</b> | <b>121481220</b> | <b>2.37E-04</b> |
| <b>HSCB</b>           | <b>chr22</b> | <b>27468154</b>  | <b>27472034</b>  | <b>5.98E-03</b> |
| HTR2C                 | chrX         | 113720089        | 113965715        | 1.32E-04        |
| <b>IL17A</b>          | <b>chr6</b>  | <b>52153710</b>  | <b>52161460</b>  | <b>8.47E-03</b> |
| <b>IL2</b>            | <b>chr4</b>  | <b>123594562</b> | <b>123600373</b> | <b>3.40E-04</b> |
| <b>IL27</b>           | <b>chr16</b> | <b>28424058</b>  | <b>28431137</b>  | <b>4.45E-05</b> |
| <b>IL4I1</b>          | <b>chr19</b> | <b>55089433</b>  | <b>55097079</b>  | <b>5.92E-04</b> |
| <b>ITCH</b>           | <b>chr20</b> | <b>32413474</b>  | <b>32562865</b>  | <b>5.89E-04</b> |
| <b>ITFG2</b>          | <b>chr12</b> | <b>2786772</b>   | <b>2793831</b>   | <b>9.90E-04</b> |
| ITGB1BP2              | chrX         | 70437800         | 70440760         | 2.02E-04        |
| <b>ITIH1</b>          | <b>chr3</b>  | <b>52786702</b>  | <b>52801103</b>  | <b>8.54E-03</b> |
| <b>ITPKB</b>          | <b>chr1</b>  | <b>224989444</b> | <b>224996200</b> | <b>2.47E-04</b> |
| IYD                   | chr6         | 150726421        | 150734303        | 3.30E-04        |
| <b>KCNIP4</b>         | <b>chr4</b>  | <b>20490977</b>  | <b>21563714</b>  | <b>8.79E-04</b> |
| <b>KCTD17</b>         | <b>chr22</b> | <b>35772056</b>  | <b>35780226</b>  | <b>6.27E-04</b> |
| KDELC2                | chr11        | 107848242        | 107879622        | 2.76E-04        |
| <b>KIAA0182</b>       | <b>chr16</b> | <b>84197082</b>  | <b>84206865</b>  | <b>3.56E-04</b> |
| <b>KLF10</b>          | <b>chr8</b>  | <b>103732779</b> | <b>103742600</b> | <b>8.53E-05</b> |
| <b>KLF4</b>           | <b>chr9</b>  | <b>109288846</b> | <b>109296864</b> | <b>3.46E-03</b> |
| <b>KLHL14</b>         | <b>chr18</b> | <b>28604543</b>  | <b>28612390</b>  | <b>1.65E-04</b> |
| <b>KLHL2</b>          | <b>chr4</b>  | <b>166342905</b> | <b>166463770</b> | <b>2.94E-04</b> |
| <b>KLHL30</b>         | <b>chr2</b>  | <b>238708684</b> | <b>238716605</b> | <b>4.78E-04</b> |

|                 |              |                  |                  |                 |
|-----------------|--------------|------------------|------------------|-----------------|
| <b>KLHL5</b>    | <b>chr4</b>  | <b>38735230</b>  | <b>38743041</b>  | <b>3.83E-04</b> |
| <b>KLHL6</b>    | <b>chr3</b>  | <b>184753606</b> | <b>184761558</b> | <b>4.57E-03</b> |
| KRT31           | chr17        | 36805410         | 36812797         | 3.43E-05        |
| <b>KRT6C</b>    | <b>chr12</b> | <b>51171443</b>  | <b>51172589</b>  | <b>6.11E-04</b> |
| <b>L3MBTL4</b>  | <b>chr18</b> | <b>6299272</b>   | <b>6409076</b>   | <b>9.48E-04</b> |
| LAMA4           | chr6         | 112679622        | 112687624        | 7.45E-04        |
| LCE3B           | chr1         | 150847467        | 150853584        | 2.45E-04        |
| <b>LGTN</b>     | <b>chr1</b>  | <b>204850041</b> | <b>204855737</b> | <b>2.51E-04</b> |
| <b>LMO4</b>     | <b>chr1</b>  | <b>87561350</b>  | <b>87572781</b>  | <b>4.43E-05</b> |
| LPHN2           | chr1         | 82033244         | 82041119         | 8.43E-04        |
| LUZP1           | chr1         | 23365888         | 23373020         | 1.76E-04        |
| <b>LYN</b>      | <b>chr8</b>  | <b>56949513</b>  | <b>56957701</b>  | <b>8.31E-03</b> |
| <b>MAPRE2</b>   | <b>chr18</b> | <b>30870014</b>  | <b>30878018</b>  | <b>3.18E-04</b> |
| <b>MAT1A</b>    | <b>chr10</b> | <b>82036829</b>  | <b>82044570</b>  | <b>1.73E-04</b> |
| <b>MC2R</b>     | <b>chr18</b> | <b>13873037</b>  | <b>13910778</b>  | <b>4.59E-03</b> |
| <b>MEIS1</b>    | <b>chr2</b>  | <b>66510564</b>  | <b>66518628</b>  | <b>5.49E-03</b> |
| <b>MEN1</b>     | <b>chr11</b> | <b>64327558</b>  | <b>64335014</b>  | <b>4.57E-03</b> |
| <b>MGC26733</b> | <b>chr2</b>  | <b>98064908</b>  | <b>98230344</b>  | <b>3.54E-03</b> |
| <b>MGMT</b>     | <b>chr10</b> | <b>131150140</b> | <b>131157952</b> | <b>7.50E-04</b> |
| <b>MIER1</b>    | <b>chr1</b>  | <b>67163375</b>  | <b>67171046</b>  | <b>7.45E-03</b> |
| <b>MITF</b>     | <b>chr3</b>  | <b>69865806</b>  | <b>70070929</b>  | <b>8.56E-03</b> |
| <b>MMP12</b>    | <b>chr11</b> | <b>102248846</b> | <b>102256141</b> | <b>2.21E-04</b> |
| MOCS2           | chr5         | 52438782         | 52446759         | 1.81E-04        |
| <b>MORC2</b>    | <b>chr22</b> | <b>29691428</b>  | <b>29699618</b>  | <b>3.46E-04</b> |
| MOSC2           | chr1         | 218983945        | 219024131        | 4.00E-04        |
| MPPED2          | chr11        | 30556225         | 30568471         | 5.38E-05        |
| MSR1            | chr8         | 16085978         | 16099420         | 2.64E-04        |
| <b>MSRB2</b>    | <b>chr10</b> | <b>23419235</b>  | <b>23460940</b>  | <b>6.59E-03</b> |
| MX1             | chr21        | 41720178         | 41728076         | 8.03E-04        |
| <b>NCK2</b>     | <b>chr2</b>  | <b>105829394</b> | <b>105836285</b> | <b>1.33E-04</b> |
| <b>NDST4</b>    | <b>chr4</b>  | <b>116252619</b> | <b>116259865</b> | <b>2.74E-04</b> |
| NEFH            | chr22        | 28200788         | 28208661         | 9.79E-05        |
| NETO1           | chr18        | 68681471         | 68690910         | 7.43E-04        |
| NEURL2          | chr20        | 43953187         | 43957312         | 9.53E-05        |
| <b>NFATC1</b>   | <b>chr18</b> | <b>75253029</b>  | <b>75263841</b>  | <b>7.42E-03</b> |
| NHN1            | chr16        | 87164352         | 87166556         | 1.30E-04        |
| <b>NOL4</b>     | <b>chr18</b> | <b>30054784</b>  | <b>30061524</b>  | <b>8.96E-04</b> |
| <b>NOX4</b>     | <b>chr11</b> | <b>88861718</b>  | <b>88869890</b>  | <b>1.87E-04</b> |

|                 |              |                  |                  |                 |
|-----------------|--------------|------------------|------------------|-----------------|
| <b>NUDT2</b>    | <b>chr9</b>  | <b>34314130</b>  | <b>34331459</b>  | <b>8.57E-03</b> |
| <b>NUFIP2</b>   | <b>chr17</b> | <b>24642755</b>  | <b>24649732</b>  | <b>9.26E-04</b> |
| <b>OR9Q1</b>    | <b>chr11</b> | <b>57641047</b>  | <b>57705597</b>  | <b>1.53E-04</b> |
| OSGEPL1         | chr2         | 190334140        | 190341242        | 8.69E-04        |
| <b>PAN3</b>     | <b>chr13</b> | <b>27641279</b>  | <b>27648649</b>  | <b>2.94E-05</b> |
| PARP12          | chr7         | 139406758        | 139410930        | 7.39E-04        |
| <b>PAX7</b>     | <b>chr1</b>  | <b>18824807</b>  | <b>18833022</b>  | <b>7.99E-03</b> |
| <b>PCDH7</b>    | <b>chr4</b>  | <b>30325765</b>  | <b>30333629</b>  | <b>8.73E-03</b> |
| <b>PCDHGA12</b> | <b>chr5</b>  | <b>140784943</b> | <b>140792948</b> | <b>4.53E-03</b> |
| <b>PCID1</b>    | <b>chr11</b> | <b>32556607</b>  | <b>32564063</b>  | <b>6.89E-04</b> |
| <b>PDLIM5</b>   | <b>chr4</b>  | <b>95587209</b>  | <b>95594593</b>  | <b>8.74E-03</b> |
| PEX5            | chr12        | 7231705          | 7236661          | 4.01E-04        |
| PIGA            | chrX         | 15248015         | 15268160         | 1.02E-04        |
| <b>PIP5K2A</b>  | <b>chr10</b> | <b>23041096</b>  | <b>23048726</b>  | <b>8.02E-03</b> |
| <b>PLN</b>      | <b>chr6</b>  | <b>118971500</b> | <b>118987764</b> | <b>8.91E-04</b> |
| POU4F1          | chr13        | 78073422         | 78081073         | 5.39E-04        |
| <b>PRC1</b>     | <b>chr15</b> | <b>89336939</b>  | <b>89342667</b>  | <b>7.84E-03</b> |
| <b>PRDM5</b>    | <b>chr4</b>  | <b>122060791</b> | <b>122066481</b> | <b>4.58E-03</b> |
| <b>PRLHR</b>    | <b>chr10</b> | <b>120342455</b> | <b>120350300</b> | <b>5.01E-03</b> |
| <b>PRMT3</b>    | <b>chr11</b> | <b>20361912</b>  | <b>20367973</b>  | <b>6.92E-03</b> |
| PRPF4B          | chr6         | 3962299          | 3968859          | 2.74E-04        |
| PRRC1           | chr5         | 126876206        | 126889567        | 6.30E-04        |
| PSMC3           | chr11        | 47402169         | 47407571         | 9.40E-04        |
| PTCHD1          | chrX         | 23256567         | 23265464         | 7.09E-04        |
| <b>PTGDR</b>    | <b>chr14</b> | <b>51798860</b>  | <b>51806320</b>  | <b>4.79E-03</b> |
| PTPN9           | chr15        | 73656287         | 73663773         | 2.96E-04        |
| <b>PTPRT</b>    | <b>chr20</b> | <b>41249397</b>  | <b>41257020</b>  | <b>1.48E-04</b> |
| <b>PVRL2</b>    | <b>chr19</b> | <b>50036396</b>  | <b>50083184</b>  | <b>2.00E-04</b> |
| <b>R3HDM1</b>   | <b>chr2</b>  | <b>136005646</b> | <b>136141865</b> | <b>3.63E-05</b> |
| <b>RAB28</b>    | <b>chr4</b>  | <b>13092357</b>  | <b>13100571</b>  | <b>2.03E-04</b> |
| <b>RAB30</b>    | <b>chr11</b> | <b>82458231</b>  | <b>82465717</b>  | <b>1.52E-04</b> |
| RAB31           | chr18        | 9692866          | 9700434          | 7.96E-04        |
| <b>RABGAP1</b>  | <b>chr9</b>  | <b>124743174</b> | <b>124916451</b> | <b>1.05E-04</b> |
| <b>RABGAP1L</b> | <b>chr1</b>  | <b>172390394</b> | <b>172686075</b> | <b>3.63E-04</b> |
| RAI2            | chrX         | 17727596         | 17735874         | 3.26E-06        |
| <b>RASL11B</b>  | <b>chr4</b>  | <b>53417780</b>  | <b>53425823</b>  | <b>7.33E-03</b> |
| <b>RASSF3</b>   | <b>chr12</b> | <b>63285471</b>  | <b>63292522</b>  | <b>2.09E-05</b> |
| <b>RASSF8</b>   | <b>chr12</b> | <b>25998953</b>  | <b>26005641</b>  | <b>7.12E-03</b> |

|                   |              |                  |                  |                 |
|-------------------|--------------|------------------|------------------|-----------------|
| RHOBTB1           | chr10        | 62371394         | 62432647         | 1.71E-04        |
| <b>RICTOR</b>     | <b>chr5</b>  | <b>39107897</b>  | <b>39113613</b>  | <b>5.70E-03</b> |
| <b>RNF103</b>     | <b>chr2</b>  | <b>86701144</b>  | <b>86708020</b>  | <b>1.38E-04</b> |
| <b>RNF122</b>     | <b>chr8</b>  | <b>33542054</b>  | <b>33549671</b>  | <b>2.07E-04</b> |
| <b>RNF130</b>     | <b>chr5</b>  | <b>179372715</b> | <b>179436732</b> | <b>2.37E-03</b> |
| RNF146            | chr6         | 127624447        | 127651965        | 4.20E-04        |
| <b>RNF17</b>      | <b>chr13</b> | <b>24231354</b>  | <b>24304582</b>  | <b>5.57E-05</b> |
| RORB              | chr9         | 76296737         | 76305221         | 2.44E-05        |
| RPL41             | chr12        | 54794071         | 54797480         | 1.01E-04        |
| <b>RSPO2</b>      | <b>chr8</b>  | <b>109160982</b> | <b>109168013</b> | <b>7.33E-03</b> |
| <b>RUNX1T1</b>    | <b>chr8</b>  | <b>93096291</b>  | <b>93182090</b>  | <b>4.24E-03</b> |
| SALL1             | chr16        | 49740247         | 49748161         | 1.76E-06        |
| SAMSN1            | chr21        | 14837999         | 14845840         | 3.44E-04        |
| SCGB1D1           | chr11        | 61711612         | 61716640         | 2.79E-04        |
| SEMA4D            | chr9         | 91282126         | 91289928         | 7.42E-03        |
| SERTAD2           | chr2         | 64731894         | 64739516         | 7.87E-04        |
| SETD1A            | chr16        | 30873891         | 30903504         | 8.27E-04        |
| SFRS15            | chr21        | 32023827         | 32031453         | 2.22E-04        |
| SIAH1             | chr16        | 46954747         | 46982117         | 5.85E-04        |
| SLC15A4           | chr12        | 127862393        | 127880009        | 2.28E-04        |
| SLC2A4            | chr17        | 7122640          | 7128427          | 8.73E-03        |
| SLIT1             | chr10        | 98932959         | 98940303         | 4.32E-04        |
| SMAD7             | chr18        | 44728524         | 44736598         | 7.85E-03        |
| SNX24             | chr5         | 122205841        | 122211447        | 5.04E-03        |
| SOX3              | chrX         | 139412492        | 139420461        | 3.35E-04        |
| <b>SOX5</b>       | <b>chr12</b> | <b>23991389</b>  | <b>24612164</b>  | <b>1.80E-04</b> |
| <b>SPG20</b>      | <b>chr13</b> | <b>35805495</b>  | <b>35824248</b>  | <b>5.69E-03</b> |
| SPTBN5            | chr15        | 39971213         | 39978844         | 6.28E-04        |
| SPTY2D1           | chr11        | 18610334         | 18616203         | 5.00E-04        |
| SRGAP3            | chr3         | 9263509          | 9270751          | 7.99E-04        |
| SSR3              | chr3         | 157753189        | 157760735        | 1.51E-04        |
| <b>SSTR4</b>      | <b>chr20</b> | <b>22958743</b>  | <b>22966641</b>  | <b>8.72E-03</b> |
| <b>ST6GALNAC3</b> | <b>chr1</b>  | <b>76307640</b>  | <b>76315346</b>  | <b>8.64E-03</b> |
| STAG2             | chrX         | 122919322        | 122986516        | 6.87E-03        |
| STARD13           | chr13        | 32655725         | 32763172         | 2.18E-04        |
| STATIP1           | chr18        | 31963993         | 31968819         | 7.60E-04        |
| STAU2             | chr8         | 74819094         | 74826642         | 4.25E-04        |
| STOM              | chr9         | 123169762        | 123177476        | 4.33E-04        |

|                |              |                  |                  |                 |
|----------------|--------------|------------------|------------------|-----------------|
| STXBP5         | chr6         | 147561475        | 147569771        | 7.57E-04        |
| <b>TACC3</b>   | <b>chr4</b>  | <b>1693044</b>   | <b>1698204</b>   | <b>7.33E-03</b> |
| TCF21          | chr6         | 134246927        | 134254747        | 8.53E-03        |
| <b>TCF7L2</b>  | <b>chr10</b> | <b>114694749</b> | <b>114702928</b> | <b>3.94E-04</b> |
| TCL1B          | chr14        | 95218064         | 95224454         | 1.41E-04        |
| <b>TCL6</b>    | <b>chr14</b> | <b>95194152</b>  | <b>95203571</b>  | <b>5.84E-03</b> |
| <b>TEX13B</b>  | <b>chrX</b>  | <b>107109621</b> | <b>107115901</b> | <b>8.35E-03</b> |
| <b>THBD</b>    | <b>chr20</b> | <b>22975907</b>  | <b>22982857</b>  | <b>6.06E-05</b> |
| TIGD2          | chr4         | 90249763         | 90255555         | 2.76E-04        |
| <b>TLE3</b>    | <b>chr15</b> | <b>68173699</b>  | <b>68182765</b>  | <b>7.76E-04</b> |
| TMED2          | chr12        | 122630929        | 122648492        | 2.63E-04        |
| <b>TMEM17</b>  | <b>chr2</b>  | <b>62584425</b>  | <b>62592297</b>  | <b>8.57E-03</b> |
| TRIM72         | chr16        | 31132568         | 31134549         | 6.26E-05        |
| <b>TSPY1</b>   | <b>chrY</b>  | <b>9270695</b>   | <b>9975448</b>   | <b>5.56E-05</b> |
| TTC12          | chr11        | 112685555        | 112692968        | 3.32E-07        |
| <b>TTC14</b>   | <b>chr3</b>  | <b>181797316</b> | <b>181805128</b> | <b>2.50E-04</b> |
| <b>TWF2</b>    | <b>chr3</b>  | <b>52237659</b>  | <b>52248179</b>  | <b>9.86E-03</b> |
| <b>TXNDC10</b> | <b>chr18</b> | <b>64530956</b>  | <b>64538834</b>  | <b>8.56E-03</b> |
| <b>TXNDC3</b>  | <b>chr7</b>  | <b>37849871</b>  | <b>37857133</b>  | <b>6.21E-03</b> |
| UBE1           | chrX         | 46931164         | 46959474         | 3.52E-04        |
| <b>UBE2I</b>   | <b>chr16</b> | <b>1293821</b>   | <b>1306356</b>   | <b>4.15E-05</b> |
| <b>UPF1</b>    | <b>chr19</b> | <b>18799619</b>  | <b>18806398</b>  | <b>1.27E-04</b> |
| <b>UTS2</b>    | <b>chr1</b>  | <b>7833210</b>   | <b>7841176</b>   | <b>8.70E-03</b> |
| <b>VGLL3</b>   | <b>chr3</b>  | <b>87120644</b>  | <b>87128306</b>  | <b>4.06E-04</b> |
| <b>VPS35</b>   | <b>chr16</b> | <b>45275797</b>  | <b>45280444</b>  | <b>5.17E-04</b> |
| WDR42B         | chrX         | 27907041         | 27914981         | 6.37E-06        |
| WFDC9          | chr20        | 43693628         | 43698831         | 3.37E-04        |
| <b>WWOX</b>    | <b>chr16</b> | <b>76685605</b>  | <b>76693698</b>  | <b>4.05E-04</b> |
| <b>ZBTB16</b>  | <b>chr11</b> | <b>113430193</b> | <b>113636269</b> | <b>5.70E-03</b> |
| <b>ZBTB2</b>   | <b>chr6</b>  | <b>151752230</b> | <b>151759706</b> | <b>8.72E-03</b> |
| ZCCHC7         | chr9         | 37105474         | 37112644         | 5.69E-04        |
| <b>ZDHHC6</b>  | <b>chr10</b> | <b>114191649</b> | <b>114196563</b> | <b>1.99E-04</b> |
| <b>ZFP36</b>   | <b>chr19</b> | <b>44583835</b>  | <b>44591634</b>  | <b>8.19E-04</b> |
| <b>ZNF44</b>   | <b>chr19</b> | <b>12264345</b>  | <b>12271193</b>  | <b>5.41E-03</b> |
| <b>ZNF451</b>  | <b>chr6</b>  | <b>57058090</b>  | <b>57142944</b>  | <b>9.24E-03</b> |
| <b>ZNF667</b>  | <b>chr19</b> | <b>61678252</b>  | <b>61685739</b>  | <b>2.69E-05</b> |

Footnotes:

1. AR target genes in PLC5 cells identified by ChIP-chip. Common targets identified in both HCC cell lines are bolded.
2. The chromosome location and genomic coordinates of the probe in the Agilent human ChIP-chip array that shows significant AR binding in HCC cells by the ChIP Analytics software.
3. The minimal  $P[Xbar]$  value of the probes corresponding to the AR-bound genes. A gene promoter was considered as positive for AR binding if the probes have  $P[Xbar] < 10^{-3}$ .



**Table S2. AR, CCRK and  $\beta$ -catenin immunohistochemical scores in HCC tissues.**

|    |       | CCRK |    |   |       |
|----|-------|------|----|---|-------|
|    |       | 1    | 2  | 3 | Total |
| AR | 0     | 9    | 0  | 0 | 9     |
|    | 1     | 3    | 4  | 2 | 9     |
|    | 2     | 1    | 5  | 0 | 6     |
|    | 3     | 1    | 5  | 1 | 7     |
|    | Total | 14   | 14 | 3 | 31    |

|                  |       | CCRK |    |   |       |
|------------------|-------|------|----|---|-------|
|                  |       | 1    | 2  | 3 | Total |
| $\beta$ -catenin | 0     | 13   | 9  | 1 | 23    |
|                  | 1     | 1    | 1  | 2 | 4     |
|                  | 2     | 0    | 1  | 0 | 1     |
|                  | 3     | 0    | 3  | 0 | 3     |
|                  | Total | 14   | 14 | 3 | 31    |

|    |       | $\beta$ -catenin |   |   |   |       |
|----|-------|------------------|---|---|---|-------|
|    |       | 0                | 1 | 2 | 3 | Total |
| AR | 0     | 8                | 1 | 0 | 0 | 9     |
|    | 1     | 8                | 1 | 0 | 0 | 9     |
|    | 2     | 5                | 0 | 1 | 0 | 6     |
|    | 3     | 2                | 2 | 0 | 3 | 7     |
|    | Total | 23               | 4 | 1 | 3 | 31    |

Immunohistochemistry was performed in the same cohort of HCC specimens used for the Western blot analysis. Based on sample availability, AR, CCRK and  $\beta$ -catenin staining were performed and scored in 31 HCC specimens. Nuclear AR and  $\beta$ -catenin staining reflects the percentage of positive nuclei whereas cytoplasmic CCRK staining reflects a combination of the percentage of positively-stained cells and the intensity of the stain. All 3 comparisons of the immunohistochemical scores (AR-CCRK, CCRK- $\beta$ -catenin and AR- $\beta$ -catenin) were significantly correlated ( $p = 0.004$ ,  $0.032$  and  $0.024$ , respectively; 2-sided Pearson Chi-Square test).

**Table S3. Primers used for ChIP-PCR and RT-PCR in this study.**

| Gene           | Primer      | Sequence                              | Experiment |
|----------------|-------------|---------------------------------------|------------|
| <i>CCRK</i>    | CCRK-F      | 5'- CGCAACGGCCCAAAGTAG -3'            | ChIP-PCR   |
|                | CCRK-R      | 5'- CCACCCTCCGGCTAACG -3'             |            |
| <i>FLT1</i>    | FLT1-F      | 5'- CCTACAGTGAGTTCTCAGAAGTTACCA -3'   | ChIP-PCR   |
|                | FLT1-R      | 5'- AGACCGTCAGTTTCCAAGTAACAAG -3'     |            |
| <i>GADD45β</i> | GADD45β-F   | 5'- CCACGCCCAATGTTCAAGTC -3'          | ChIP-PCR   |
|                | GADD45β-R   | 5'- AATCCAGGAAGTTGCGGAAA -3'          |            |
| <i>KLHL2</i>   | KLHL2-F     | 5'- GTCGAACCCCTTAAGCAAAGAA -3'        | ChIP-PCR   |
|                | KLHL2-R     | 5'- CCGTCTGACAGCTAGGCACAT -3'         |            |
| <i>MIER1</i>   | MIER1-F     | 5'- CATTTGGATACAAAGAAGATATCTGTTGA -3' | ChIP-PCR   |
|                | MIER1-R     | 5'- CTTTTATTATGCCAGAATCTACCTCCTT -3'  |            |
| <i>NUDT2</i>   | NUDT2-F     | 5'- ATCGTGGCAGTTATAGCAGAAGTAAA -3'    | ChIP-PCR   |
|                | NUDT2-R     | 5'- ACCCGGCCTGCATTGTTT -3'            |            |
| <i>PDLIM5</i>  | PDLIM5-F    | 5'- CTCTCCATGCCTGATTTAGTTCTG -3'      | ChIP-PCR   |
|                | PDLIM5-R    | 5'- GAAACATTTGGTAATTTAGGGAGAAAAG -3'  |            |
| <i>PEG10</i>   | PEG10-F     | 5'- ATGATGACATCGAGCTCCG -3'           | ChIP-PCR   |
|                | PEG10-R     | 5'- GCTGGGTAGTTGTGCATCA -3'           |            |
| <i>STARD13</i> | STARD13-F   | 5'- TACCACCACGCCTGGCTAAT -3'          | ChIP-PCR   |
|                | STARD13-R   | 5'- AGGCCGGTGGATCACAAG -3'            |            |
| <i>TCF7L2</i>  | TCF7L2-F    | 5'- TACAGCACCAGGCAACGAAA -3'          | ChIP-PCR   |
|                | TCF7L2-R    | 5'- TGAATCTCTCCTTCCTTAAATCTCTGA -3'   |            |
| <i>UBE2I</i>   | UBE2I-F     | 5'- GTTCTGGTAGTTAACGTGCGTAGGA -3'     | ChIP-PCR   |
|                | UBE2I-R     | 5'- AACCACCTTCATTCTGCGATTCA -3'       |            |
| <i>WWOX</i>    | WWOX-F      | 5'- GAAAGTTCTCTAAAACCAGGAAATCAG -3'   | ChIP-PCR   |
|                | WWOX-R      | 5'- TGATTCAACCTTTGTTTTGCA -3'         |            |
| <i>BANP</i>    | BANP(a)-F   | 5'-AGAAGACGGACAGGTGCAAGTAG-3'         | RT-PCR     |
|                | BANP(a)-R   | 5'-CACGTGATGGATCTGGAGGTT-3'           |            |
| <i>CCND1</i>   | CCND1(a)-F  | 5'-CCGTCCATGCGGAAGATC-3'              | RT-PCR     |
|                | CCND1(a)-R  | 5'-ATGGCCAGCGGAAGAC-3'                |            |
| <i>CCRK</i>    | CCRK(a)-F   | 5'-GCACCAGGCATAGCCACTTT-3'            | RT-PCR     |
|                | CCRK(a)-R   | 5'-TCCCTGGGCCTAGACTTCTGT-3'           |            |
| <i>CCNF</i>    | CCNF(a)-F   | 5'-CAATGCCATCCTGACACACTTT-3'          | RT-PCR     |
|                | CCNF(a)-R   | 5'-GCCTCTTGGTACCTCAGATGT-3'           |            |
| <i>CDKN1B</i>  | CDKN1B(a)-F | 5'-TGCCCTCCCCAGTCTCTCTT-3'            | RT-PCR     |
|                | CDKN1B(a)-R | 5'-CAAGCACCTCGGATTTTTGC-3'            |            |

|                                 |                      |                                   |        |
|---------------------------------|----------------------|-----------------------------------|--------|
| <i>CDK5R2</i>                   | CDK5R2(a)-F          | 5'-CCTTTCCATTTTCCGTTCCCTT-3'      | RT-PCR |
|                                 | CDK5R2(a)-R          | 5'-ACAGGTGCAGGAGGAGAAACA-3'       |        |
| <i>CDK6</i>                     | CDK6(a)-F            | 5'-AAAGCCCTCTTGAAGCAAAAGA-3'      | RT-PCR |
|                                 | CDK6(a)-R            | 5'-TGGGAAAGGAGCAAGAGCAT-3'        |        |
| <i>EGFR</i>                     | EGFR-F               | 3'-ATGTCCGGGAACACAAAGAC-3'        | RT-PCR |
|                                 | EGFR-R               | 5'-TTCCGTCATAGTTCTTGGAT-3'        |        |
| <i>ESCO1</i>                    | ESCO1(a)-F           | 5'-AAAAGGAAAGCTCCAGCTAAATAGG-3'   | RT-PCR |
|                                 | ESCO1(a)-R           | 5'-ACTTTCTACTTCCTCCTTCCATCAAAG-3' |        |
| <i>EVI1</i>                     | EVI1(a)-F            | 5'-TGGGTGAGAAGGGCAGTTG-3'         | RT-PCR |
|                                 | EVI1(a)-R            | 5'-GTTCCAATCATGTCAGGTGATC-3'      |        |
| <i>GADD45<math>\beta</math></i> | GADD45 $\beta$ (a)-F | 5'-GCTGCCACAAACAAAAATACAAT-3'     | RT-PCR |
|                                 | GADD45 $\beta$ (a)-R | 5'-GACTCTGCCCCCGATGGT-3'          |        |
| <i>GAPDH</i>                    | GAPDH-F              | 5'-ACAACAGCCTCAAGATCATCAG-3'      | RT-PCR |
|                                 | GAPDH-R              | 5'-GGTCCACCACTGACACGTTG-3'        |        |
| <i>HPGD</i>                     | HPGD(a)-F            | 5'-GGCAGTCAAGGAATAAACTACAGTGTA-3' | RT-PCR |
|                                 | HPGD(a)-R            | 5'-AGGAGGCTGAACTGTGAATCAAC-3'     |        |
| <i>MAPRE2</i>                   | MAPRE2(a)-F          | 5'-GCAGTCTGGTGTAGACTGGAAT-3'      | RT-PCR |
|                                 | MAPRE2(a)-R          | 5'-GGAGGGCCCTTGTGTTAAAGA-3'       |        |
| <i>MEN1</i>                     | MEN1(a)-F            | 5'-GTCCAGTGCTCACTTCCAGAGT-3'      | RT-PCR |
|                                 | MEN1(a)-R            | 5'-GCCGTGAGTTGCAGCTTGAT-3'        |        |
| <i>PNN</i>                      | PNN-F                | 5'-CCTTTCTGGTCTCTGGTGGAG-3'       | RT-PCR |
|                                 | PNN-R                | 5'-TGATTCTCTTCTGGTCCGACG-3'       |        |
| <i>PRC1</i>                     | PRC1(a)-F            | 5'-CAGCGCAACTTCAGCATTAATT-3'      | RT-PCR |
|                                 | PRC1(a)-R            | 5'-GTTCTCGCTGAAGCCCAACA-3'        |        |
| <i>RABGAP1</i>                  | RABGAP1(a)-F         | 5'-ATTACGGGAGCTGTGGACAGA-3'       | RT-PCR |
|                                 | RABGAP1(a)-R         | 5'-TTTACAGACACGCAACTCAGTCTTT-3'   |        |
| <i>SIAH1</i>                    | SIAH1(a)-F           | 5'-CAGAAAGTAAAGGTGACATCGGAAA-3'   | RT-PCR |
|                                 | SIAH1(a)-R           | 5'-AGCTCAAAGGTGTGACTCATCTGT-3'    |        |
| <i>STAG2</i>                    | STAG2(a)-F           | 5'-CCATGCCTTAATATGCTTGCAA-3'      | RT-PCR |
|                                 | STAG2(a)-R           | 5'-CTACCACAGCCCAATGCTTGA-3'       |        |
| <i>TACC3</i>                    | TACC3(a)-F           | 5'-AAGACCAACTTACCACAGATCTGAACT-3' | RT-PCR |
|                                 | TACC3(a)-R           | 5'-TCTTGCGGTAGCCCTCGAT-3'         |        |
| <i>TCF7L2</i>                   | TCF7L2(a)-F          | 5'-GCGCGGGATAACTATGGAAA-3'        | RT-PCR |
|                                 | TCF7L2(a)-R          | 5'-GTGAAAGGCAAGGATTTAGGAAAC-3'    |        |
| <i>UBE2I</i>                    | UBE2I(a)-F           | 5'-CTCCTGCCGCTCCTCTCTAGA-3'       | RT-PCR |
|                                 | UBE2I(a)-R           | 5'-ACAAAGGAAGTGGCGCAGAA-3'        |        |
| <i>UPF1</i>                     | UPF1(a)-F            | 5'-TGCCTGCCGGCAACTTT-3'           | RT-PCR |
|                                 | UPF1(a)-R            | 5'-CACCTCAGTCCCTTCACACA-3'        |        |
